# Supplementary material for: Understanding personal agency through metaphor, or Why academic writing is (not) like a roller-coaster ride
Source: Frontiers journal article supplement (doi:10.3389/flang.2025.1567498), 2025-07-17
Supplement: Data_Sheet_2.docx [file Data_Sheet_2.docx]

# Appendix: Complete data set of metaphors and explanations

(01)

Gummitwist.

[…] weil man manchmal einfach „springen“ (i. e. loslegen, auch wenn man nicht perfekt vorbereitet ist) muss & weil es immer vor-/zurück bzw. hin- & hergeht (zickzack).

Chinese jump rope [Elastics].

[...] because sometimes one just has to “jump” (i.e. get going, even if one is not perfectly prepared) & because it goes always back/forth or to & fro (zigzag).

(02)

Das Bauen eines Gebäudes.

- Man fängt bei beidem mit einem Gerüst (Gliederung) an.
- Vervollständigt nach und nach einzelne Bausteine.
- Man braucht einen Plan/Idee vom Ergebnis.
- Am Ende macht man den Feinschliff und verschönert.
- Man kann immer weitermachen ohne je fertig zu werden.
- Es gibt bei beiden Vorhaben meist eine Deadline, die oft nicht eingehalten wird.
- Wenn es fertig ist, möchte man es anderen Menschen zeigen & stolz darauf sein.
- Es ist ein langer Prozess, in dem nicht immer alles so läuft, wie man es plant.
- Mit Hilfe von anderen geht es schneller & einfacher & macht mehr Spaß.

The construction of a building.

- For both, one starts with a scaffold [framework] (outline).
- [One] completes individual building blocks little by little.
- One needs a plan/idea of the result.
- At the end one makes the finishing touches and embellishes.
- One can go on and on without ever finishing.
- There is usually a deadline for both undertakings, which is often not met.
- When it's done, one wants to show it off to other people & be proud of it.
- It is a long process where not everything always goes as one plans.
- With the help of others it goes faster & easier & is more fun.

(03)

Dimensionsreduktion, also im mathematischen Sinne die Projektion von hochdimensionalen in niedrigdimensionale Vektorräume.

Man versucht in dem hochdimensionalen Raum allen Wissens und aller vorherigen Studien die Komponente zu finden, die für das eigene Forschungsprojekt relevant sind, um am Ende einen niedrigdimensionalen Raum zu haben, der übersichtlich genug ist um das Thema zu erfassen, und die eigenen Ideen schließlich in eine eindimensionale Form, den Text, zu bringen.

Dimensionality reduction, i.e. in a mathematical sense the projection of high dimensional vector spaces into low dimensional vector spaces.

One tries to find in the high-dimensional space of all knowledge and all previous studies the components that are relevant for one’s own research project, in order to end up with a low-dimensional space that is clear [lit. ‘overviewish’] enough to grasp the topic, and to finally put one’s own ideas into a one-dimensional form, the text.

(04)

Ein Meer.

Das ist bzw. kann oft unruhig sein, wenn es windig ist. Und so ist auch das wiss. Schreiben oft unruhig, weil man nicht weiß, in welche Richtung man jetzt schwimmen soll und wenn die Wellen sehr hoch sind, kann man lange auf einer Stelle „schwimmen“ bzw. „schreiben“. Aber irgendwann wird das Meer ruhig und man kann problemlos losschwimmen (bzw. losschreiben) und man hat klares Wasser in Sicht bzw. einen klaren Blick u. eine klare Richtung vor Augen, wo die Arbeit hinführen soll. Und wenn man fertig ist u. was geschafft hat, kann man sich an den Strand legen u. den Ausblick aufs Meer bzw. seine Arbeit (im besten Falle die gedruckte Arbeit ☺ ) genießen. ☺

A sea.

It [=the sea] is or can be often restless [un-calm] when it is windy. And so academic writing is also often restless [un-calm], because one does not know in which direction one should swim now and if the waves are very high, one can “swim” or “write” on one spot for a long time. But at some point in time the sea becomes calm and one can start swimming (or writing) without any problems and one has clear water in sight or a clear view and a clear direction in front of one’s eyes of where one’s work should lead. And when one is done and one has accomplished something, one can lie down on the beach and enjoy the view of the sea or one’s work (in the best case, the printed work [=thesis] ☺ ). ☺

(05)

Eine unendliche Geschichte.

Bis ich mit einem Text halbwegs zufrieden bin, vergeht sehr, sehr viel Zeit. Wenn es keine Deadlines geben würde, weiß ich nicht, ob ich den ein oder anderen Text überhaupt jemals abgegeben hätte. Da die Diss. so gesehen auch keine Deadline hat, ist sie für mich so etwas wie eine unendliche Geschichte. Das heißt nicht, dass die Geschichte nicht schön ist oder keinen Spaß macht, aber ihr (zunächst) offenes Ende macht sie auch sehr anstrengend.

A never-ending story.

A lot of [very, very much] time passes before I am halfway satisfied with a text. If there were no deadlines, I don't know if I would have ever handed in one or the other text. Since – seen in this way – the dissertation has no deadline either, it is something like a never-ending story for me. That doesn’t mean the story isn’t beautiful or makes fun, but its (initially) open ending also makes it very exhausting.

(06)

Eine Sprache lernen. Man beginnt mit der Basis und arbeitet sich zu den Details und Herausforderungen durch, bis man es in einem Gesamtverständnis abschließt.

Ich habe diese Metapher gewählt, weil sowohl wissenschaftliches Schreiben zu lernen als auch später dessen Ausübung dem Erlernen einer neuen Sprache ähnelt. Als Anfängerin muss ich mir zunächst die grundlegenden Regeln wissenschaftlichen Schreibens aneignen bis ich fähig bin, einen zusammenhängenden, allgemeinverständlichen Text zu schreiben. Ein wissenschaftlicher Text selbst sollte wiederum genauso von den grundlegenden Konzepten her, die übergeordnete Thematik herleiten. Dies ist dem Zusammenfügen einzelner Vokabeln anhand der Regeln der Grammatik ähnlich. Beides ist nötig, um Sprache anzuwenden.

Learning a language. One starts with the basics and works one’s way through to the details and challenges until one finishes it with an overall understanding.

I have chosen this metaphor because both learning academic writing and also later its practice [practicing] resemble the learning of a new language. As a beginner, I must first learn the basic rules of academic writing until I am able to write a coherent, generally understandable text. An academic text itself should, in turn, derive the overarching theme in the same way from the basic concepts. This is similar to putting together individual vocabulary words using the rules of grammar. Both is necessary to use language.

(07)

Puzzeln und Collage.

Puzzeln meine ich nicht im Sinne von Zitaten aneinanderreihen od. der sogenannten Zitate-Collage, aber ich schreibe und lese immer recht einzelteilig, d. h. ich lese einen Text, bis ich ihn weglegen muss, weil er zu Ende ist od. weil er mich gerade inhaltlich abgehängt hat. Genauso mache ich das auch beim Schreiben. Ich schreibe mal am Exposé od. der Einleitung, mal am Forschungsstand od. der Methode, die ich gerade als Idee od. weitere Idee habe. Das kann durchaus innerhalb von einer Stunde mehrmals wechseln. Es ist wie ein „Hier hab‘ ich was“ und „Jetzt hab ich hier auch noch ‘was“ – „Oh, und hier fällt mir was ein“ 🡪 Puzzeln oder collagieren stelle man sich mal von oben, links nach rechts unten gehend vor 🡪 no way!

Making a jigsaw puzzle and collage.

I don’t mean making a puzzle in the sense of lining up quotes or the so-called quote collage, but I always write and read in single parts, i.e. I read a text until I have to put it down because it is finished or because it has just lost me in terms of content. I do it in the same way with writing. I write sometimes on the exposé or the introduction, sometimes on the state of research or the method that I just have as an idea or further idea. This can by all means change several times within an hour. It's like “Now I have got something here” and “Now I have got something here, too” – “Oh, and here is something I can think of” 🡪 Imagine doing a puzzle or collage from top, left to bottom right 🡪 no way!

(08)

Bergsteigen/wandern.

Es gibt einfachere Phasen + schwierige Phasen, die man in beiden Tätigkeiten durchlaufen muss. Trotz schwieriger Abschnitte ist man am Ende stolz auf das Erreichte!

Mountaineering/hiking.

There are easier stages + more difficult stages one has to go through in both activities. Despite difficult sections, at the end one is proud of the achieved [what one has achieved]!

(09)

Bergsteigen.

Spontan assoziiere ich (wissenschaftliches) Schreiben mit Bergsteigen. Man hat ein Ziel vor Augen, kann dieses aber oft nur „schwer“ und mit viel Anstrengung in mehreren Etappen erreichen. Es gibt Etappen, die einem leicht fallen (obwohl sie „viele Höhenmeter“ erfordern), andere Etappen/Wege sind steinig, anstrengend und nur mühsam zu schaffen. Bergsteigen ist eine Disziplin, die Zusammenarbeit erfordert; ähnlich ist es oft auch beim Schreiben. Durch Unterstützung von anderen Personen (z. B. Schreibberatung, Austausch unter Kollegen über Inhalte usw.) kommt man eher zum Ziel. Neben der Zusammenarbeit mit anderen Personen ist das Nutzen von Hilfsmitteln entscheidend. Hilfsmittel können dabei z. B. verschiedene Schreibtechniken sein.

Mountaineering.

Spontaneously, I associate (academic) writing with mountaineering. One has a goal in front of oneself, but often one can only reach it „with difficulty” and with a lot of effort in several stages. There are stages that are easy (although they require „many meters of altitude”), other stages/routes are stony, exhausting and difficult to manage. Mountaineering is a discipline that requires collaboration; similarly, writing often requires collaboration. Through support from others (e.g., writing consultation, exchanges among colleagues about contents [topics], etc.) one is more likely to reach [rather reaches] one’s goal. In addition to collaboration with other persons, the use of auxiliary means [aids, tools] is crucial. Auxiliary means can be, for example, different writing techniques.

(10)

Luftballons aufblasen.

Es erinnert mich an Luftballons aufblasen, weil man oft denkt, aus einem ganz kleinen Anfang (oder auch einem einzigen signifikanten Effekt, den man gefunden hat) ein ganzes großes Paper zu machen. Und dazu muss man es ausweiten und quasi „aufblasen“, um das fertige Produkt zu erhalten. Man muss es mit immer mehr umgeben, damit man am Ende ein fertiges „großes“ Produkt erhält. Manchmal muss man aber auch ein bisschen Luft wieder auslassen, weil man sich verzettelt hat und der Ballon zu groß geworden ist als dass man ihn noch jemandem in die Hand drücken könnte.

Blowing up balloons.

It reminds me of blowing up balloons because one often thinks one can make a whole big paper out of a very small beginning (or even [out of] a single significant effect that one has found). And to do that, one has to expand it and sort of “blow it up” to get the finished product. One has to surround it with more and more [things] so that, in the end, one gets a finished “big” product. But sometimes one has to let some of the air out again because one has gotten bogged down [lit. ‘dis-chitted’, too many pieces of paper] and the balloon has gotten too big to put in anyone’s hand.

(11)

Das Kochen eines guten Kaffes.

Das Kaffeepulver steht stellvertretend für den inhaltlichen Input z. B. aus Literatur oder eigenen erhobenen Daten. Zu viel des Guten macht den Kaffee zu stark – es wird zu viel um das Thema herumgeredet oder auch „geschwafelt“. Zu wenig davon und der Text ist nicht schlüssig oder zu oberflächlich, was vergleichbar mit einem wässrigen Kaffee ist. Nur die richtige Menge sorgt für einen schlüssigen, prägnanten Text – und ein geschmackvolles Kaffeeerlebnis.

Making a good coffee.

The coffee powder is representative for the content input e.g. from literature or own collected data. Too much of a good thing makes the coffee too strong – there is too much talk or even “rambling” [too much is talked or even “rambled”] around the topic. Too little of it and the text is inconclusive or too superficial, which is comparable to a watery coffee. Only the right amount makes for a coherent, concise text – and a tasty coffee experience.

(12)

Detektivarbeit.

Ich beobachte etwas, das mich wundert und bei dem ich mich frage "Warum ist das eigentlich so?", und dann geht die Suche nach der Antwort auch schon los.

Detective work.

I observe something that astonishes me and makes me wonder “Why is that [actually the case]?”, and then the search for the answer already begins.

(13)

Backen einer Hochzeitstorte.

Das Backen einer Hochzeitstorte ist eine mehrtägige Aufgabe. Hierbei stelle ich mir eine sehr pompöse, Aufwendig im Detail und mehrstöckige Torte vor. Die Stockwerke spiegeln die einzelnen Bereiche eines papers/ Antrages wieder. Als erstes haben wir den ersten Stock, der bildet das Fundament, so ist auch die Einleitung in ein Thema und die Hypothesen/Fragestellung. Dann haben wir den nächsten Teil (Stock) der aus dem Material und Methoden besteht. Darauf folgt der dritte Stock (Ergebnisse). Hier ist das Stockwerk viel kleiner, weil es fokussiert ist, und die Beschreibung der Ergebnisse ist. Die Diskussion/Interpretation ist die Verzierung der Torte. Hier darf man ein wenig kreativer sein und neue Ideen/Hypothesen aufstellen. Im allgemeinen darf man nicht viel am Rezept (Zutaten, Backzeit, Ruhezeit) ändern, damit die Torte auch gut schmeckt. Das wissenschaftliche Schreiben ist sehr strukturiert und erlaubt nur wenig Änderung. Klar gibt es verschiedene Stile je nach Journal (wo man es veröffentlichen möchte) doch das Muster ist im wesentlichen das selbe. Es gibt ja auch verschieden Torten mit verschiedenen Geschmäckern und Farben/ Verzierungen, doch das Wesentliche ist gleich.

Baking a wedding cake.

The baking of a wedding cake is a task that takes several days. Here I imagine a very pompous, elaborate in detail and multi-level cake. The floors reflect the individual areas of a paper/ proposal. First, we have the second floor, which is the foundation, so is the introduction to a topic and the hypothesis/question. Then we have the next part (floor) which consists of the material and methods. This is followed by the third floor (results). Here the floor is much smaller because it is focused and because it is the description of the results. The discussion/interpretation is the decoration of the cake. Here one is allowed to be a little more creative and come up with new ideas/hypotheses. In general, one must not change much about the recipe (ingredients, baking time, resting time) to make the cake taste good. Academic writing is very structured and allows for only little change. Sure there are different styles depending on the journal (where one wants to publish it) but the pattern is essentially the same. After all, there are different cakes with different flavors and colors/decorations, but the essence is the same.

(14)

Malen nach Zahlen.

Wissenschaftliches Schreiben ist für mich ein sehr kreativer Prozess, der viele Suchbewegungen benötigt, der aber gerahmt wird durch ein Regelwerk, das helfen, aber auch begrenzen kann.

Painting by numbers.

For me, academic writing is a very creative process that requires many search movements, but is framed by a set of rules that can help, but also limit.

(15)

Eine Achterbahnfahrt.

Das wissenschaftliche Schreiben verbinde ich mit einer Vielzahl von Tätigkeiten und Gefühlen, die aufeinander folgen und die teilweise ein ziemliches Auf und Ab darstellen. Von der Idee für einen Text über die Recherche, ggf. die Datengenerierung, dann das Schreiben an sich, die Überarbeitungsschritte, ggf. die Kooperation mit Anderen, die Präsentation auf Kongressen, das Einreichen bei Journals, das Warten auf Feedback, die Spannung, das Auf- und Ab der Gefühle bei Annahme oder Ablehnung, das Niedergeschlagensein bei Kritik, der Widerwille und die Qual beim Einarbeiten der Kritik, die Freude, wenn es geschafft ist und man vor allem merkt, wie der Text dadurch besser wird und gewinnt. Schlussendlich die Euphorie, wenn man seinen Artikel gedruckt liest. Dann aber auch schon wieder das Wissen, dass alles wieder von vorne los geht. Manchmal fragt man sich, warum man sich das antut und das immer wieder macht. Dann wiederum hat man Momente, wo man im Flow ist und merkt, dass man genau das tut, was man kann und liebt und warum man es tut :-)

A roller coaster ride.

I associate academic writing with a multitude of activities and feelings that follow one another and that sometimes represent quite an up and down. From the idea for a text to the research, possibly the data generation, then the writing itself, the revision steps, possibly the cooperation with others, the presentation at congresses, the submission to journals, the waiting for feedback, the tension, the ups and downs of the feelings when [the paper is] being accepted or rejected, the feeling of being downhearted when receiving criticism, the reluctance and the agony when incorporating the criticism, the joy when it is done and one notices above all how the text becomes better and gains [from the criticism]. Finally, the euphoria when one reads one’s article in print. But then again the knowledge that everything starts all over again. Sometimes one asks oneself why one does this to oneself and why one does this again and again. Then again one has moments where one is in flow and realizes that one is doing exactly what one can and loves and why one does it :-)

(16)

Aufräumen.

Es ist wie Aufräumen, weil ich Gelesenes ordne und in eine neue, für mich logische Reihenfolge bringe. Danach ist alles schön und man sieht es sich gerne an.

Tidying up.

It is like tidying up, because I arrange what I have read and put it in a new order that is logical for me. After that, everything is beautiful and one likes to look at it.

(17)

Klavier spielen.

Wie beim Klavierspielen muss man wissenschaftliches Schreiben auch erst lernen und dann immer wieder üben. Dies gilt auch für Texte die man schreibt. Man schreibt nicht sofort den ‚perfekten‘ Text (das vortragen des Klavierstücks bei einem Konzert), sondern ‚übt‘ erst einmal und überarbeitet den Text immer wieder bis man das finale Produkt (quasi die Konzertaufführung) hat

Playing the piano.

Like playing the piano, one has to learn academic writing then practice it again and again. This also applies to the texts one writes. One does not immediately write the ‘perfect’ text (the performing of the piano piece at a concert), but first ‘practices’ and revises the text again and again until one has the final product (the concert performance, so to say).

(18)

Puzzeln.

Man muss versuchen, aus dem Chaos an Ideen, Gedanken, Erkenntnissen, Darstellungen, Problemen und Fragen aus den Bergen verschiedener Literatur und dem was einem (häufig unklarer Herkunft) so durch den Kopf geht, im Schreiben/ durch das Schreiben passende Teile zu finden bzw. herzustellen und zusammenzusetzen. Welches Gesamtbild das Puzzle darstellt, was passt und was nicht, sieht man häufig erst am Ende bzw. wenn man ein gutes Stück weit gekommen ist. Es ist mühsam, man braucht Geduld, aber es hat auch einen Suchtfaktor, wenn man mal damit begonnen hat und häufig greift man eher intuitiv zu den richtigen Teilen, da läuft viel unbewusst ab.

Making a jigsaw puzzle.

One must try – from the chaos of ideas, thoughts, insights, representations, problems and questions from the mountains of different literature and what goes through one’s head (often of unclear origin) – to find or produce and assemble fitting pieces in writing/through writing. What the overall picture of the puzzle is, what fits and what doesn’t, one often only sees at the end or when one has come a good bit further. It is tedious, one needs patience, but it also has an addictive factor, once one has started with it and often one reaches rather intuitively for the right pieces, a lot of it is going on unconsciously.

(19)

Sport.

Genau wie beim Sport – insbesondere wenn man länger keinen gemacht hat – fällt einem auch beim wissenschaftlichen Schreiben der Anfang schwer. Beides erfordert relativ viel oder zumindest regelmäßige Übung, um besser/sicherer darin zu werden. Bei regelmäßiger Ausübung stellt sich auch gerne mal so etwas wie Spaß dabei ein und es kostet deutlich weniger Überwindung. Insgesamt gilt aber, dass es sowohl gute als auch schlechte Tage gibt, also Tage, an denen einem alles gelingt und Tage, an denen einfach nichts klappt. Trotzdem fühlt man sich hinterher meist besser – man bekommt den Kopf frei und ist im besten Fall (also zumindest an guten Tagen) stolz auf sich. Außerdem ist wissenschaftliches Schreiben anstrengend – man benötigt regelmäßige Pausen wie auch beim Sport und beides lässt sich sowohl im Team als auch alleine ausüben.

Sports.

Just like sports – especially if one has not done any for a while – academic writing is hard to get started with. Both require a relatively large amount of practice, or at least regular practice, in order to become better and more confident at it. With regular practice, something like fun sets in, and it takes less effort. Overall, however, [it is true that] there are both good and bad days, i.e. days on which one succeeds at everything and days on which nothing works. Nevertheless, one usually feels better afterwards – one clears [gets cleared] one’s head and, in the best case (at least on good days), one is proud of oneself. Moreover, academic writing is exhausting – one needs regular breaks, just like in sports, and both can be done in a team as well as alone.

(20)

Wie Schalten beim Fahren oder gar ein Flugzeug steuern.

... es sind doch einige Sachen, auf die man gleichzeitig achten und sich deshalb vorher vorbereiten soll. Und es macht Spaß, wenn man die Technik beherrscht und gar nicht so viel darüber nachdenkt.

Like shifting gears while driving or even piloting an airplane.

... there are quite a few things one has to pay attention to at the same time and therefore prepare oneself beforehand. And it makes fun when one masters the technology and does not think about it so much.

(21)

Wandern.

Die Landschaft, d.h. die zu schreibenden Texte, die aufzuschreibenden Ideen, rufen. Beim Wandern wie beim Schreiben erklimme ich Berge und durchquere Täler, das geht mal leichter, mal schwerer. Ist das Ziel erreicht oder ein Gipfel erklommen, habe ich nicht nur einen guten Überblick von der Text-Landschaft, sondern kann auch stolz auf das Geschaffte und mein Durchhaltevermögen sein.

Hiking.

The landscape, i.e. the texts to be written, the ideas to be written down, are calling. When hiking as when writing, I climb mountains and cross valleys, sometimes this is easier, sometimes this is more difficult. Once the goal has been reached or a peak has been reached, I not only have a good overview of the textual landscape, but can also be proud of the achieved and of my stamina.

(22)

Ein Medikament!

Es kann was bewirken!

A medicine!

It can effect something!

(23)

Eine Weltreise.

Es geht mit Vorfreude und Neugier auf Neues und Unbekanntes los. Aber angesichts des Unbekannten gleichzeitig auch mit Zweifeln, ob die Entscheidung richtig ist oder doch zu wagemutig. Unterwegs prägen einen immer neue Eindrücke, neue Impulse, neue Inhalte. Und beeinflusst durch diese neuen Impressionen passt man die weitere Reise immer wieder den neuen Umständen/dem neuen Ich an, gestaltet den Weg/die Destinationen stetig neu. Die Reise ist anregend und aufregend. Aber auch anstrengend und immer mal wieder mit dem Gedanken behaftet, ob man nicht abbrechen und zurückkehren soll. Die Reaktionen von Freunden sind zwiespältig: Manche halten einen für verrückt, andere bewundern einen, manche zweifeln, manche trauen zu.

A trip around the world.

It starts with anticipation and curiosity about new and unknown things. But in view of the unknown, at the same time with doubts as to whether the decision is right or too daring. On the road, new impressions, new impulses, new content always leave their mark. And influenced by these new impressions, one adapts the further journey again and again to the new circumstances/the new self [new I], constantly redesigns the path/destinations. The journey is stimulating and exciting. But it is also exhausting, and every now and then tainted with the thought about whether one should break off and return. The reactions of friends are ambivalent: some think one is crazy, others admire one, some doubt, some have confidence.

(24)

Träumen.

Manchmal erscheinen Träume ganz klar in ihrer Narration, lebendig, mitreißend und überzeugend. Im nächsten Moment kann aber alles ganz verschwommen und verworren sein. Wann fängt es an, wann hört es auf? Einige Träume bleiben einem wie Schreibmomente lange und genau in Erinnerung, kommen sogar immer wieder in Variation. Andere wiederum verfliegen, verblassen, fallen dem Vergessen anheim. Träume sind so kreativ wie das Schreiben. Ist Schreiben nicht auch (schön wie) Träumen - Träumen nicht auch (im Geiste) Schreiben?

Dreaming.

Sometimes dreams appear quite clear in their narration, vivid, involving and convincing. The next moment, however, everything can be quite blurry and confused. When does it begin, when does it end? Some dreams, like writing moments, stay kept in one’s memory long and accurately, even come back again and again in variation. Others evaporate, fade away, fall into oblivion. Dreams are as creative as writing. Isn’t writing also (as beautiful as) dreaming – isn’t dreaming also writing (in one’s mind)?
